# Supplementary material
Source: publisher figshare collection journal article supplement (https://gsajournals.figshare.com/ndownloader/files/11502740)
Supplement: Supplementary file 1 [file 11502740]

## Sheet: Sheet1
Screen Number Df(2R)n	BDSC Number	Number of genes removed	Number of embryos imaged		Closure initially normal	Dorsal closure completes	Dorsal Closure phenotype severity	Dorsal closure tissue(s) and processes affected by Df(2R)n				Confirmed or Suspected Oscillation Defects	Known dorsal closure gene(s)	Known dorsal closure gene(s) references	Do the known dorsal closure genes fully phenocopy the Df(2R)n
								Amnioserosa	Lateral Epidermis	Zipping/Canthus	PAS/DME
Df(2R)01	741	66	8		Yes	Yes	None
Df(2R)02	25705	35	8		Yes	Yes	Mid-severity			+			scaf	(Rousset et al. 2010), (Sorrosal et al. 2010)	Yes - Similar to published phenotype
Df(2R)03	32253	55	7		Yes	Yes	Strong but closes	+		+	+		Src42A	(Tateno et al. 2000)	Unknown - Phenotype described from cuticle defects in combination with other mutants
Df(2R)04	9683	60	7		Yes	Yes	Strong but closes	+		+	+		Src42A	(Tateno et al. 2000)	No - Phenotype described from cuticle defects in combination with other mutants, Df(2R)04 is more severe than Df(2R)03
Df(2R)05	8045	103	7		Yes	Yes	Mid-severity			+
Df(2R)06	9062	103	7		Yes	Yes	Mid-severity	+		+
Df(2R)07	8931	111	8		Yes	Yes	Mid-severity			+
Df(2R)08	8941	111	8		Variable	Variable	Strong and fails	+	+	+	+
Df(2R)09	24335	66	8		Variable	Variable	Strong and fails	+	+	+	+
Df(2R)10	9276	91	9		Variable	Yes	Strong but closes			+	+		ptc	(Jankovics et al. 2011)	No - Published phenotype is less severe
Df(2R)11	9157	116	6		Variable	Yes	Strong but closes		+	+	+		Gγ1, ptc	(Yi et al. 2008), (Jankovics et al. 2011)	Unknown - Additive effect of 2 genes has not been tested
Df(2R)12	9063	113	6		Yes	Yes	Mid-severity	+		+			Pkn	(Lu and Settleman 1999)	Unknown - Phenotype described from germline clones and cuticle defects
Df(2R)13	23665	33	8		Yes	Yes	Mid-severity	+
Df(2R)14	9410	45	11		Yes	Yes	Mid-severity	+				Confirmed
Df(2R)15	23682	42	11		Yes	Yes	None
Df(2R)16	9539	26	10		No	Yes	Strong but closes		+	+
Df(2R)17	1702	67†	9		No	No	Strong and fails		+	+	+		Jra	(Riesgo-Escovar and Hafen 1997)	No - Published phenotype is less severe
Df(2R)18	23686	17	11		No	No	Strong and fails				+		Jra	(Riesgo-Escovar and Hafen 1997)	Yes - similar to published phenotype
Df(2R)19	23666	58	7		Yes	Yes	None
Df(2R)20	25428	125	7		Yes	No	Strong and fails				+		shn, acal	(Rusten et al. 2002), (Fernandez et al. 2007) (Ríos-Barrera et al. 2015)	Unknown - Additive effect of 2 genes has not been tested
Df(2R)21	8910	101	6		Yes	No	Strong and fails				+		shn	(Rusten et al. 2002), (Fernandez et al. 2007)	No - published phenotype is less severe
Df(2R)22	8912	57	7		Yes	Variable	Strong but closes	+	+	+	+
Df(2R)23	9626	53	6		Yes	Yes	Mid-severity				+	Suspected
Df(2R)24	26551	36	9		Yes	No	Strong but closes			+
Df(2R)25	24929	33	6		Yes	Yes	None
Df(2R)26	7543	56	10		No	Yes	Weak
Df(2R)27	23688	16	7		Yes	Yes	None
Df(2R)28	30585	76	6		Yes	Yes	Mid-severity	+		+		Suspected	Mos	(Sopko et al. 2014)	No - Phenoytpe described from cuticle defects with RNAi, Df(2R)28 is more severe than Df(2R)29
Df(2R)29	24989	63	7		Yes	Yes	None						Mos	(Sopko et al. 2014)	Unknown - Phenoytpe described from cuticle defects with RNAi
Df(2R)30	442	216†	N/A		N/A	N/A	N/A
Df(2R)31	7544	3	6		Yes	Yes	Weak
Df(2R)32	7871	31	7		Yes	No	Strong and fails	+	+	+			Ack-like	(Zahedi et al. 2008)	No - Published phenotype is less severe
Df(2R)33	23169	78	11		Yes	Variable	Strong and fails	+		+	+		GstE14	(Enya et al. 2014)	Unknown - Phenotype described from cuticle defects
Df(2R)34	23170	41	7		Yes	Yes	Weak
Df(2R)35	23690	38	8		No	Yes	Mid-severity		+	+			shot	(Takács et al. 2017)	No - Published phenotype is less severe
Df(2R)36§	24385	78	6		Yes	Yes	None						shot	(Takács et al. 2017)	N/A - Problem with Df, reference Results/Discussion
Df(2R)37	24407	29	9		No	Yes	Mid-severity		+	+		Suspected	shot	(Takács et al. 2017)	No - Published phenotype is less severe
Df(2R)38	7875	21	7		Yes	Yes	Weak
Df(2R)39	7876	18	6		Yes	Yes	Weak
Df(2R)40*	8913*	43	8		Yes	Variable	Strong and fails	+	+		+
Df(2R)40Clean	8913	43	9		Yes	Yes	Weak
Df(2R)41	7749	49	7		Yes	Yes	None
Df(2R)42	24933	17	6		Yes	Yes	None
Df(2R)43	25741	35	8		Yes	Yes	None
Df(2R)44	9064	72	7		Variable	Yes	Strong but closes		+				scb, Arf51F	(Wada et al. 2007), (Jankovics et al. 2011)	Unknown - Additive effect of 2 genes has not been tested
Df(2R)45	24931	46	9		Yes	Yes	Mid-severity			+	+	Suspected	Zasp52	(Jankovics et al. 2011)	No - Zasp52 published phenotype is more severe due to a suspected 2nd site lesion
Df(2R)46	23691	52	6		Yes	Yes	Mid-severity			+	+	Suspected	Zasp52		No - Zasp52 published phenotype is more severe due to a suspected 2nd site lesion
Df(2R)47	8915	25	9		Yes	Yes	Strong but closes	+		+			Rho1	(Lu and Settleman 1999), (Rodriguez-Diaz et al. 2008)	Yes - Similar to null allele phenotype
Df(2R)48	29661	72	6		Yes	Yes	None						shark	(Fernandez et al. 2000)	No - Phenotype described from cuticle defects in germline clones, zygotic nulls survive to larval stages, Df does not hatch
Df(2R)49	25078	26	6		Yes	Yes	None
Df(2R)50	7888	19	7		Yes	Yes	Mid-severity				+		Cdk4	(Sopko et al. 2014)	Unknown - Phenotype described from RNAi
Df(2R)51	7546	25	7		Yes	Yes	None
Df(2R)52	9278	62	6		Yes	Yes	Weak					Confirmed	RhoGEF2	(Azevedo et al. 2011)	Unknown - Phenotype described from germline clones
Df(2R)53	24356	66	6		Yes	Yes	None						RhoGEF2	(Azevedo et al. 2011)	Unknown - Phenotype described from germline clones
Df(2R)54	7548	46	7		Yes	Yes	None
Df(2R)55	9596	28	7		Yes	Yes	None
Df(2R)56	24379	16	6		Yes	Yes	Weak
Df(2R)57	38465	30	7		Yes	Yes	None						POSH	(Lennox and Stronach 2010), (Zhang et al. 2010)	Unknown - Published phenotype described from cuticle defects, has low penetrance (10-12%)
Df(2R)58	7890	30	6		Yes	Yes	None
Df(2R)59	24371	61	8		Yes	Yes	None
Df(2R)60	6780	61†	6		No	Yes	Strong but closes		+	+
Df(2R)61	9066	105	12		No	Yes	Strong but closes		+	+
Df(2R)62	8918	145	7		No	Yes	Strong but closes		+	+			ena	(Grevengoed et al. 2001), (Gates et al. 2007)	No - Published phenotype is less severe
Df(2R)63	7551	23	8		No	No	Strong and fails				+		rib, cora, ena	(Nüsslein-Volhard et al. 1984), (Blake et al. 1998), (Lamb et al. 1998), (Grevengoed et al. 2001), (Gates et al. 2007)	Unknown - Additive effect of 3 genes has not been tested
Df(2R)64	9423	19	7		Yes	Yes	Mid-severity			+		Suspected
Df(2R)65	27354	10	6		Yes	Yes	None
Df(2R)66	9067	62	11		Yes	Yes	Mid-severity				+
Df(2R)67	30588	205	7		Yes	Yes	Weak
Df(2R)68	7896	24	7		Yes	Yes	Weak
Df(2R)69	6609	65	13		Yes	Yes	None						mir-311, mir-312	(Leaman et al. 2005)	Unknown - Phenotype described from RNAi
Df(2R)70	26553	83	6		Yes	Yes	None						mir-311, mir-312	(Leaman et al. 2005)	Unknown - Phenotype described from RNAi
Df(2R)71	26554	92	7		Yes	Yes	Mid-severity	+		+			mir-311, mir-312	(Leaman et al. 2005)	No - Phenotype described from RNAi, Df(2R)71 has more severe phenotype than Df(2R)69 and 70
Df(2R)72	9267	95	6		Yes	Yes	Strong but closes			+			shg	(Gorfinkiel et al. 2007)	No - Ecad-GFP rescues null completely, Reference Figures 12 and 13
Df(2R)73	30590	14	12		Yes	Yes	None
Df(2R)74	27582	35	8		Yes	Yes	Weak
Df(2R)75	26516	92	6		No	No	Strong and fails	+					Egfr	(Shen et al. 2013)	Yes - Similar to published phenotype
Df(2R)76	25430	112	6		Yes	Yes	None
Df(2R)77	282	118†	N/A		N/A	N/A	N/A
Df(2R)78	25431	25	6		Yes	Yes	None
Df(2R)79	27359	29	6		Yes	Yes	None
Df(2R)80	29988	36	N/A		N/A	N/A	N/A
Df(2R)81	25432	13	6		Yes	Yes	None
Df(2R)82	27356	10	6		Yes	Yes	None
Df(2R)83	26866	85	10		No	Yes	Mid-severity	+
Df(2R)84	26513	62	6		Yes	Yes	Mid-severity	+			+
Df(2R)85	9424	113	8		Yes	No	Strong and fails	+				Suspected	gbb	(Chen et al. 1998)	Unknown - Phenotype described in combination with other mutants
Df(2R)86	24380	43	7		Yes	Yes	None
Df(2R)87	27352	91	7		Yes	Yes	None
Df(2R)88	25437	88	7		Yes	Yes	None
Df(2R)89	2471	38†	N/A		N/A	N/A	N/A
Df(2R)90	25441	6	6		Yes	Yes	Mid-severity	+		+			zip	(Jacinto et al. 2002), (Franke et al. 2005)	Yes - Similar to published phenotype
Df(2R)91	4961	18†	6		Yes	Variable	Strong and fails		+	+			Kr	(Jankovics et al. 2011)	No - Published phenotype is less severe
Df(2R)92	24758	5†	10		Yes	Yes	Strong but closes			+			Kr	(Jankovics et al. 2011)	Yes - Similar to published phenotype
n†	Estimates due to undefined breakpoints
Df(2R)n§	Df does not delete the documented regions
Df(2R)n*	Df contains a 2nd site mutation
Note that color coding in column A corresponds to phenotype breakdown in Fig 14 B (gray indicates a weak/no phenotype or not imaged as shown in Fig 14 A)
